# Supplementary material for: A Systematic Review of Interventions Aiming To Improve Newly-Qualified Doctors’ Psychological Wellbeing in The United Kingdom
Source: Research Square preprint supplement (doi:10.21203/rs.3.rs-952977/v1), 2021-10-25
Supplement: Supplementary file 1 [file f783c691524812478d98632a.docx]

Appendices

# Appendix 1 - Search strategies

| **Database** | **Search strategy** |
| --- | --- |
| EMBASE | ((((("employee assist* programme*" OR "coping mechanism*" OR intervention OR support* OR "Occupational Health" OR welfare OR wellbeing OR "Psychological adj3 Wellbeing*" OR “mindful*” OR “Balint*” OR “Schwartz round*” OR psychotherap*).ti,ab OR "BALINT GROUP"/ OR "SUPPORT GROUP"/ OR PSYCHOTHERAPY/ OR "QUALITY OF WORKING LIFE"/ OR "PSYCHOLOGICAL WELL-BEING"/ OR “MINDFULNESS”/ OR "PSYCHOLOGICAL WELLBEING ASSESSMENT"/) AND (("Mental disorder*" OR suicid* OR resilien* OR "Self-Harm*" OR "Mental Illness*" OR "low morale" OR stress* OR "Mental* health*" OR "mental condition*" OR Burnout OR "work* stress" OR "occupation* stress").ti,ab OR "MENTAL DISEASE"/ OR SUICIDE/ OR "PSYCHOLOGICAL RESILIENCE"/ OR AUTOMUTILATION/ OR "PROFESSIONAL BURNOUT"/ OR "EMOTIONAL STRESS"/ OR "DEPRESSION ANXIETY STRESS SCALE"/ OR "PSYCHOLOGICAL WELL-BEING"/ OR "JOB STRESS"/)) AND ((Doctor* OR "Junior Doctor*" OR "train* doctor" OR "core train*" OR "foundation year*" OR "foundation program*" OR “medical gradua*”).ti,ab OR PHYSICIAN/)) AND ((United Kingdom OR Scotland OR England OR Great Britain).ti,ab OR "UNITED KINGDOM"/ OR (Wales NOT south).ti,ab OR ("Northern Ireland" OR (Ireland NOT republic)).ti,ab)) [DT 2004-2019] [Languages English] |
| PsycINFO | ((((("employee assist* programme*" OR "coping mechanism*" OR “intervention” OR support* OR "Occupational Health" OR welfare OR wellbeing OR "Psychological adj3 Wellbeing*" OR “mindful*” OR “Balint*” OR “Schwartz round*” OR psychotherap*).ti,ab OR PSYCHOTHERAPY/ OR "COPING BEHAVIOR"/ OR “MINDFULNESS”/ OR "SOCIAL SUPPORT"/ OR "OCCUPATIONAL HEALTH"/) AND (("Mental disorder*" OR suicid* OR resilien* OR "Self-Harm*" OR "Mental Illness*" OR "low morale" OR stress* OR "Mental* health*" OR "mental condition*" OR Burnout OR "work* stress" OR "occupation* stress").ti,ab OR "MENTAL DISORDERS"/ OR SUICIDE/ OR "RESILIENCE (PSYCHOLOGICAL)"/ OR "MENTAL HEALTH AND ILLNESS ASSESSMENT"/ OR "OCCUPATIONAL STRESS"/)) AND ((Doctor* OR "Junior Doctor*" OR "train* doctor" OR "core train*" OR "foundation year*" OR "foundation programme" OR “medical gradua*”).ti,ab OR PHYSICIANS/)) AND ((United Kingdom OR Scotland OR England OR Great Britain).ti,ab OR (Wales NOT south).ti,ab OR ("Northern Ireland" OR (Ireland NOT republic)).ti,ab)) [DT 2004-2019] [Languages English] |
| PubMed | ((("employee assist* programme*" OR "coping mechanism*" OR intervention OR support* OR "Occupational Health" OR welfare OR wellbeing OR "Psychological adj3 Wellbeing*" OR “mindful*” OR “Balint*” OR “Schwartz round*” OR psychotherap*).ti,ab AND ("Mental disorder*" OR suicid* OR resilien* OR "Self-Harm*" OR "Mental Illness*" OR "low morale" OR stress* OR "Mental* health*" OR "mental condition*" OR Burnout OR "work* stress" OR "occupation* stress").ti,ab) AND (Doctor* OR "Junior Doctor*" OR "train* doctor" OR "core train*" OR "foundation year*" OR "foundation programme" OR “medical gradua*”).ti,ab) AND ((United Kingdom OR Scotland OR England OR Great Britain).ti,ab OR (Wales NOT south).ti,ab OR ("Northern Ireland" OR (Ireland NOT republic)).ti,ab) |
| CINAHL | ((((("employee assist* programme*" OR "coping mechanism*" OR intervention OR support* OR "Occupational Health" OR welfare OR wellbeing OR "Psychological adj3 Wellbeing*" OR “mindful*” OR “Balint*” OR “Schwartz round*” OR psychotherap*).ti,ab OR "OCCUPATIONAL HEALTH SERVICES"/ OR PSYCHOTHERAPY/ OR "SELF-RATING DEPRESSION SCALE"/ OR “MINDFULNESS”/ OR "SELF-RATING ANXIETY SCALE"/ OR "PERLOW SELF-ESTEEM SCALE"/ OR "HAMILTON RATING SCALE FOR DEPRESSION"/ OR COPING/ OR "OCCUPATIONAL HEALTH"/ OR "PSYCHOLOGICAL WELL-BEING"/) AND (("Mental disorder*" OR suicid* OR resilien* OR "Self-Harm*" OR "Mental Illness*" OR "low morale" OR stress* OR "Mental* health*" OR "mental condition*" OR Burnout OR "work* stress" OR "occupation* stress").ti,ab OR "MENTAL DISORDERS"/ OR SUICIDE/ OR "INJURIES, SELF-INFLICTED"/ OR STRESS/ OR "STRESS, OCCUPATIONAL"/ OR "BURNOUT, PROFESSIONAL"/)) AND ((Doctor* OR "Junior Doctor*" OR "train* doctor" OR "core train*" OR "foundation year*" OR "foundation programme" OR “medical gradua*”).ti,ab OR PHYSICIANS/)) AND ((United Kingdom OR Scotland OR England OR Great Britain).ti,ab OR "UNITED KINGDOM"/ OR (Wales NOT south).ti,ab OR ("Northern Ireland" OR (Ireland NOT republic)).ti,ab)) [DT 2004-2019] [Languages eng] |
| Medline | (((("employee assist* programme*" OR "coping mechanism*" OR intervention OR support* OR "Occupational Health" OR welfare OR wellbeing OR "Psychological adj3 Wellbeing*" OR “mindful*” OR “Balint*” OR “Schwartz round*” OR psychotherap*).ti,ab OR "PSYCHOANALYTIC THERAPY"/ OR PSYCHOTHERAPY/ OR "ADAPTATION, PSYCHOLOGICAL"/ OR “MINDFULNESS”/ OR "OCCUPATIONAL HEALTH"/) AND (("Mental disorder*" OR suicid* OR resilien* OR "Self-Harm*" OR "Mental Illness*" OR "low morale" OR stress* OR "Mental* health*" OR "mental condition*" OR Burnout OR "work* stress" OR "occupation* stress").ti,ab OR "MENTAL DISORDERS"/ OR "OCCUPATIONAL STRESS"/ OR "STRESS, PSYCHOLOGICAL"/ OR "BURNOUT, PSYCHOLOGICAL"/)) AND ((Doctor* OR "Junior Doctor*" OR "train* doctor" OR "core train*" OR "foundation year*" OR "foundation programme" OR “medical gradua*”).ti,ab OR PHYSICIANS/)) AND ((United Kingdom OR Scotland OR England OR Great Britain).ti,ab OR "UNITED KINGDOM"/ OR (Wales NOT south).ti,ab OR ("Northern Ireland" OR (Ireland NOT republic)).ti,ab) |

##

# Appendix 2 - Studies included in the systematic review

| **No.** | **Study details** |
| --- | --- |
| 1 | Arora S, Aggarwal R, Moran A, Sirimanna P, Crochet P, Darzi A, Kneebone R, Sevdalis N. Mental practice: effective stress management training for novice surgeons*. J.Am.Coll.Surg.* 2011; **212**: 225-33. |
| 2 | Berridge E, Freeth D, Sharpe J, Roberts CM. Bridging the gap: supporting the transition from medical student to practising doctor–a two-week preparation programme after graduation*. Med.Teach.* 2007; **29**: 119-27. |
| 3 | Bu CNN, Cotzias E, Panagioti M. Mindfulness intervention for foundation year doctors: a feasibility study*. Pilot and Feasibility Studies* 2019; **5**: 61. |
| 4 | Eisen S, Sukhani S, Brightwell A, Stoneham S, Long A. Peer mentoring: evaluation of a novel programme in paediatrics*. Arch.Dis.Child.* 2014; **99**: 142-6. |
| 5 | Pal S, Kelsall AW. Physician, Heal Thyself: Introduction and Evaluation of Pilot Mindfulness Short Course for Junior Doctor*. Archives of Disease in Childhood* 2017. |
| 6 | Webb J, Brightwell A, Sarkar P, Rabbie R, Chakravorty I. Peer mentoring for core medical trainees: uptake and impact*. Postgrad.Med.J.* 2015; **91**: 188-92. |
| 7 | Wells SE, Bullock A, Monrouxe LV. Newly qualified doctors’ perceived effects of assistantship alignment with first post: a longitudinal questionnaire study*. BMJ Open* 2019; **9**: e023992. |

# Appendix 3 - modified Newcastle-Ottawa Quality Assessment Scale (mNOS) rubric (32)

| **Domain** | **2 points** | **1 point** | **0 points** |
| --- | --- | --- | --- |
| ***Selection*** | | | |
| *Representativeness of the sample* |  | Random sampling truly represents the average in the target population; or  Non-random sampling somewhat representative of the target group | Convenience sample; or  No description of the derivation of the included subjects |
| *Sample size* |  | Justified and satisfactory | Not justified; or  Inadequate information provided |
| *Non-respondents* |  | Proportion of target sample recruited attains pre-specified target; or  Basic summary of non-respondent characteristics in sampling frame recorded | Unsatisfactory recruitment rate; or  No summary data on non-respondents; or  No information provided |
| ***Comparability*** | | | |
| *Confounding factors* | Data adjusted for relevant predictors/risk factors/confounders e.g. age or sex. |  | Data not adjusted for all relevant predictors/risk factors/confounders. |
| ***Outcome*** | | | |
| *Assessment* | Independent blind assessment using objective validated laboratory methods; or  Unblinded assessment using objective validated laboratory methods | Used non-standard/ non-validated laboratory methods with gold standard | No description; or  Non-standard laboratory methods used |
| *Statistical tests* |  | Appropriate statistical test used to analyse the data described; and  Measures of association presented including confidence intervals and probability level (p value) | Statistical test not appropriate, not described or incomplete |

# Appendix 3 - modified Newcastle-Ottawa Quality Assessment Scale (mNOS) scoring criteria (32)

| **Point range** | **Description** |
| --- | --- |
| 0 to 2 points | Unsatisfactory study quality |
| 3 to 4 points | Satisfactory study quality |
| 5 to 6 points | Good study quality |
| 7 to 8 points | Very good study quality |
